# Supplementary material
Source: Springer Nature journal article supplement (https://www.springermedizin.de/resource/supplementary/13054_2011_9391_MOESM5_ESM.pdf/9706096)

**A**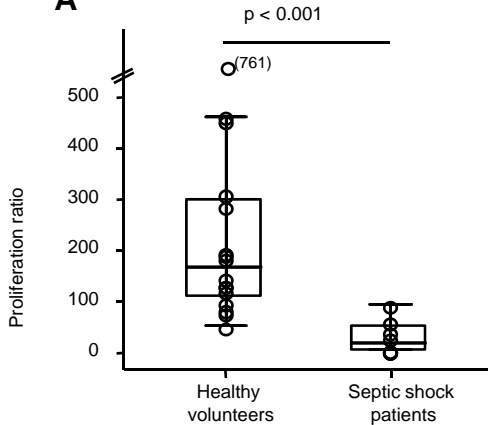**B**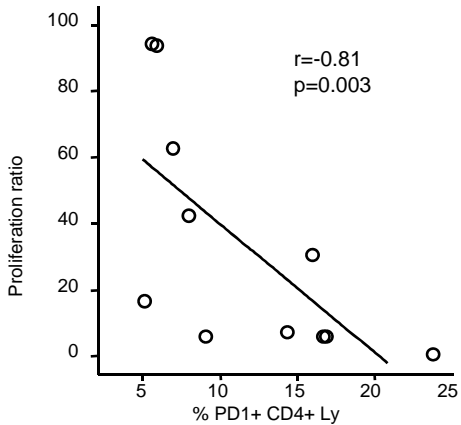

Supplement: MOESM5 [file 9706096]
